# Supplementary material for: Rapid ethnographic assessment for potential anti-malarial mass drug administration in an outbreak area of Santo Domingo, Dominican Republic
Source: Springer Nature journal article supplement (doi:10.1186/s12936-021-03594-5), 2021-02-08
Supplement: MOESM1 [file 18842204]

**Additional file 1**

**Structured interview guide for participants**

**Assistant name** \_\_\_\_\_

**Date and time** \_\_\_\_\_

**Location** \_\_\_\_\_

[After introductions]

**1. Can you describe what kind of work people do here?**

**2. What time do people leave for work, and when do they come back?**

**3. What kind of work do men do? And women?**



**4. What are the biggest health problems in this community?**



**5. Do you know what malaria is?**

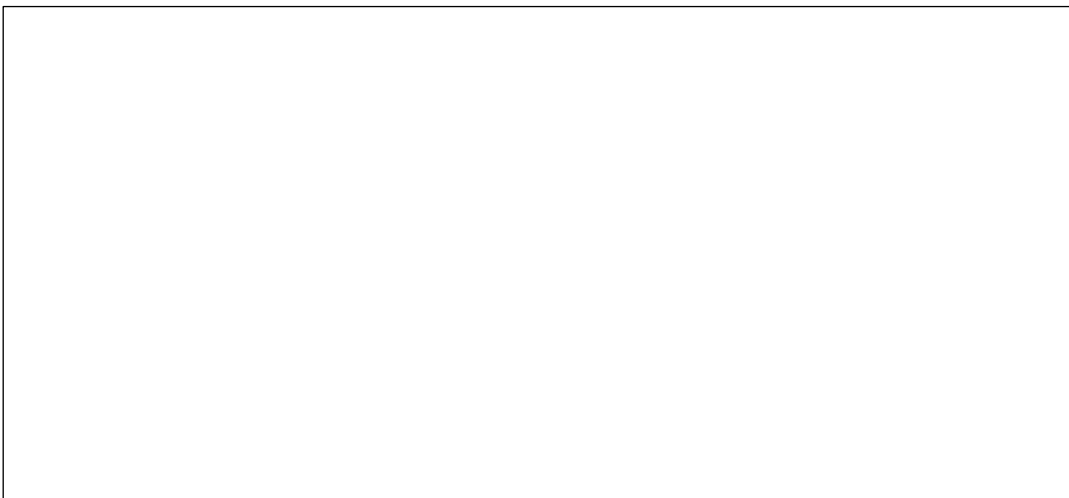

**6. How does one contract malaria?**

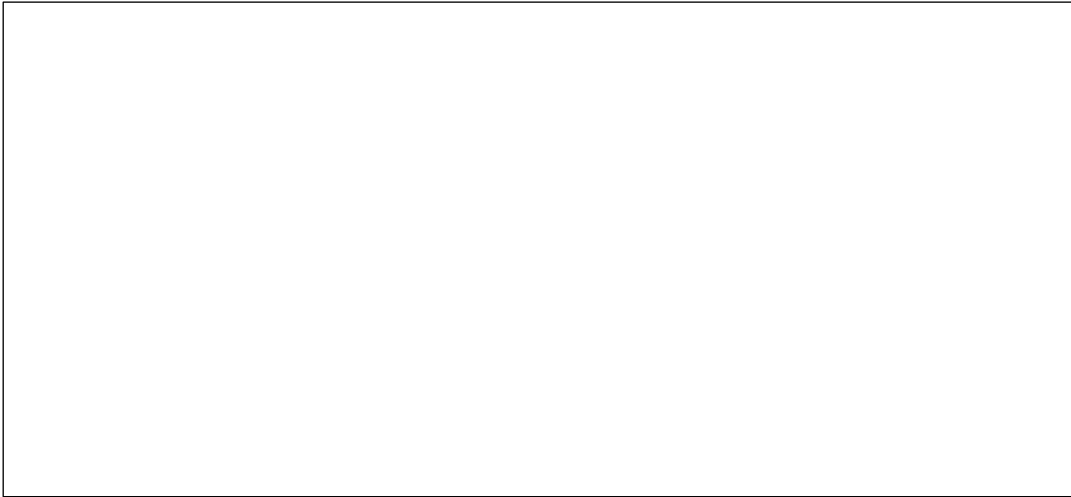A large, empty rectangular box with a thin black border, intended for the student to write their answer to question 6.

**7. How does one prevent malaria?**

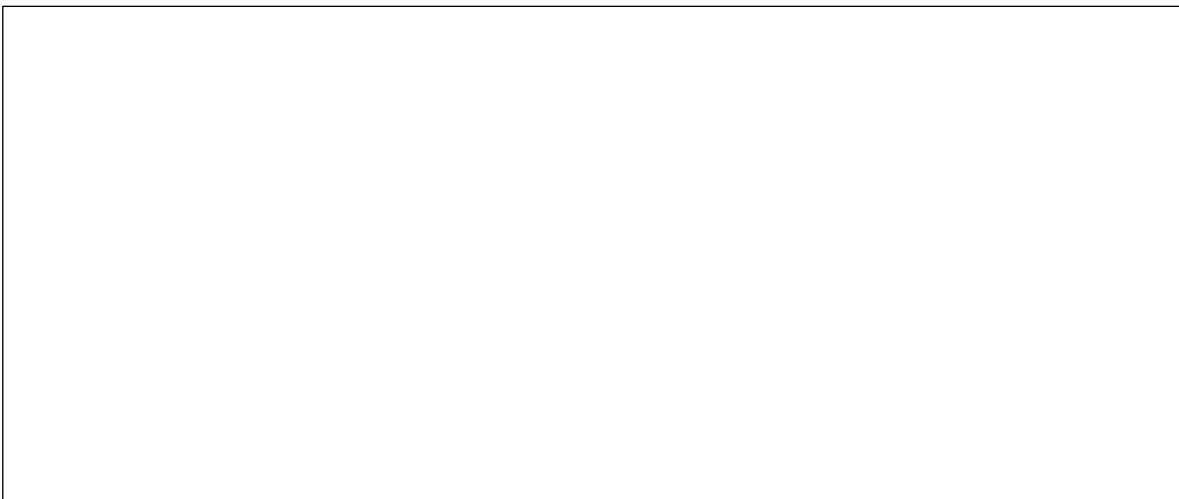A large, empty rectangular box with a thin black border, intended for the student to write their answer to question 7.

**8. What are symptoms of malaria?**

A large, empty rectangular box with a thin black border, intended for the student to write their answer to question 8.

**9. Do you think it is possible to have malaria and not have symptoms?**

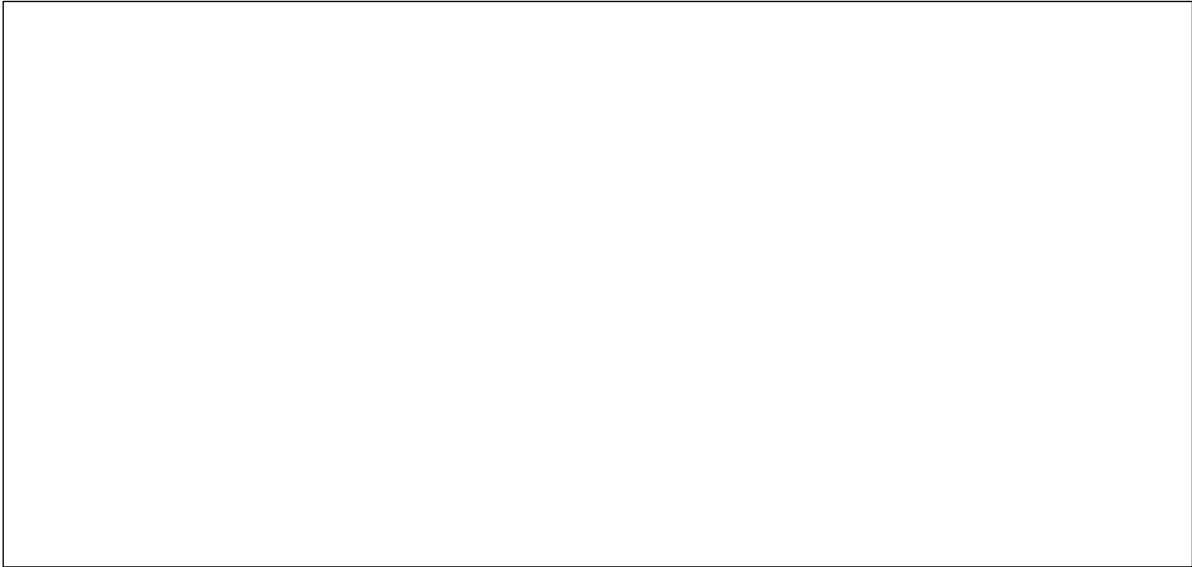

**10. If you have symptoms of malaria, what would you do?**

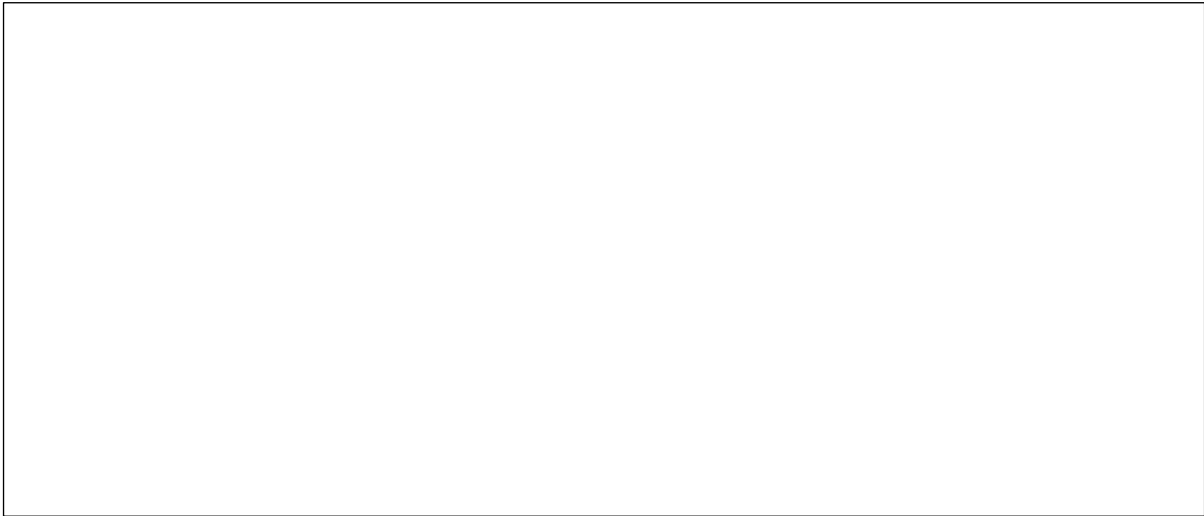

**11. If someone in the home gets sick, who makes the decision to seek care?**



**12. How does one obtain health information?**



**13. Do people here trust news and information from doctors or public health?**



**14. In your opinion, what is the best way people can learn about health problems?**

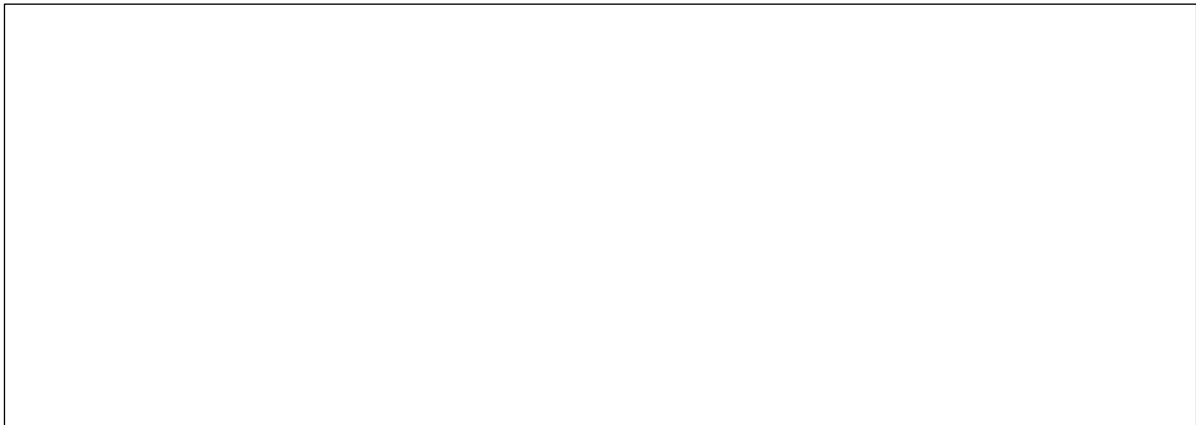

**15. What do people here think about the *juntas de vecinos*?**

**16. Who in this community helps to resolve problems?**

**17. Do you know what MDA (mass drug administration) is for malaria? [*If not, note it, and then give the following explanation:*]**

**“MDA consists of giving medicine for malaria to all people in an area at risk for contracting it, regardless of whether [one] has symptoms, to achieve elimination of malaria.”**

***NOTE THE REACTION OF THE PERSON AFTER READING THEM THE DEFINITION.***

**18. What do you think about this?**



**19. Would you participate in MDA, or take the medicine?**

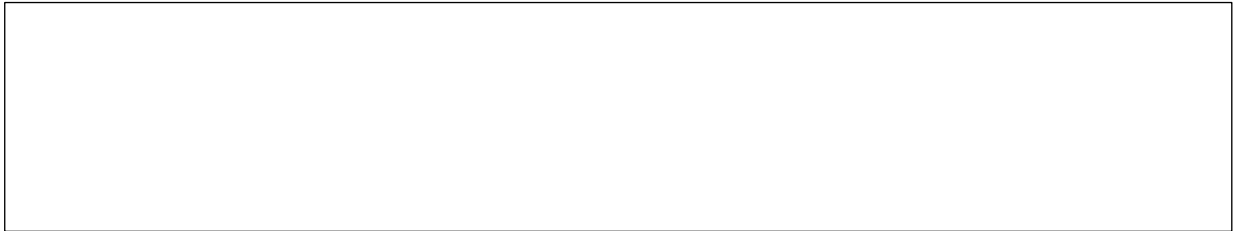

**20. Why or why not?**

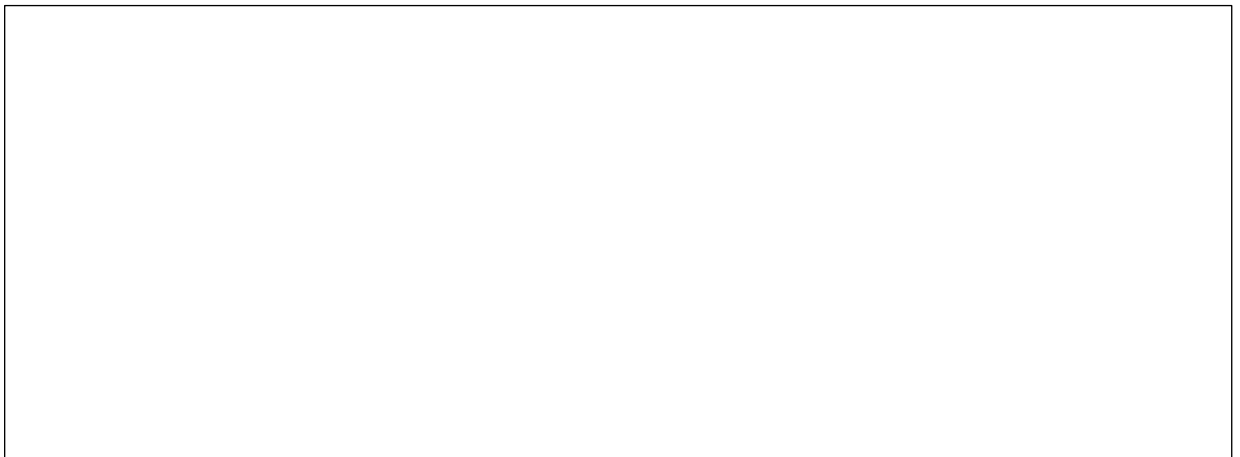

| <b>First name of participant</b> | <b>Age</b> | <b>Sex</b> | <b>Occupation</b> | <b>Residency time</b> | <b>Civil status</b> | <b>Education level</b> | <b>Telephone number</b> |
|----------------------------------|------------|------------|-------------------|-----------------------|---------------------|------------------------|-------------------------|
|                                  |            |            |                   |                       |                     |                        |                         |

**Key observations – setting of interview: place, other people nearby, type of housing, physical area, trash, mosquito habitats, population density, etc.**



**Notes from informal conversations:**

A large, empty rectangular box with a thin black border, intended for taking notes. It occupies the majority of the page below the header.
